# Supplementary material for: P-Glycoprotein-Mediated Drug Interactions in Pregnancy and Changes in the Risk of Congenital Anomalies: A Case-Reference Study
Source: Springer Nature journal article supplement (doi:10.1007/s40264-015-0299-3), 2015-05-28
Supplement: MOESM1 [file 24117326]

SUPPLEMENTARY MATERIALS

**P-glycoprotein-mediated drug interactions in pregnancy and the changes in the risk of congenital anomalies: A case-reference study**

Aizati N.A. Daud<sup>1†</sup>, Jorieke E.H. Bergman<sup>2</sup>, Marian K. Bakker<sup>2</sup>, Hao Wang<sup>3</sup>, Wilhelmina S. Kerstjens-Frederikse<sup>2</sup>, Hermien E.K. de Walle<sup>2</sup>, Henk Groen<sup>2</sup>, Jens H.J. Bos<sup>3</sup>, Eelko Hak<sup>3</sup>, Bob Wilffert<sup>1,4</sup>

<sup>1</sup>*Unit of Pharmacotherapy and Pharmaceutical Care, Department of Pharmacy, University of Groningen, The Netherlands;*

<sup>2</sup>*Department of Genetics, University of Groningen, University Medical Center Groningen, Groningen, The Netherlands;*

<sup>3</sup>*Unit of Pharmacoepidemiology and Pharmacoeconomics, Department of Pharmacy, University of Groningen, The Netherlands;*

<sup>4</sup>*Department of Clinical Pharmacy and Pharmacology, University of Groningen, University Medical Center Groningen, The Netherlands*

†Corresponding author. Tel.: +3150 3632954. Fax: +3150-3632772. E-mail address: [n.a.a.daud@rug.nl](mailto:n.a.a.daud@rug.nl)

**Supplementary Table 1: Drugs associated with P-gp transport and the number of users in cases and the reference population.**

| Drugs                                                                          | Number of users    |                                    |
|--------------------------------------------------------------------------------|--------------------|------------------------------------|
|                                                                                | Cases<br>(N=4,634) | Reference population<br>(N=25,126) |
| <b>P-gp substrates</b>                                                         |                    |                                    |
| <i>Drugs for acid related disorders, A02</i>                                   |                    |                                    |
| Cimetidine, A02BA01                                                            | 2                  | 20                                 |
| Ranitidine, A02BA02                                                            | 6                  | 142                                |
| <i>Drugs for functional gastrointestinal disorders, A03</i>                    |                    |                                    |
| Domperidone, A03FA03                                                           | 8                  | 182                                |
| <i>Antidiarrheals, intestinal anti-inflammatory/anti-infective agents, A07</i> |                    |                                    |
| Loperamide, A07DA03 (OTC)                                                      | 5                  | 40                                 |
| <i>Antithrombotic agents, B01</i>                                              |                    |                                    |
| Clopidogrel, B01AC04                                                           | 0                  | 0                                  |
| <i>Cardiac therapy agents, C01</i>                                             |                    |                                    |
| Digoxin, C01AA05                                                               | 0                  | 0                                  |
| <i>Beta-blocking agents, C07</i>                                               |                    |                                    |
| Propranolol, C07AA05                                                           | 11                 | 92                                 |
| Talinolol, C07AB13                                                             | 0                  | 0                                  |
| Celiprolol, C07AB08                                                            | 0                  | 0                                  |
| <i>Drugs acting on the renin-angiotensin system, C09</i>                       |                    |                                    |
| Losartan, C09CA01                                                              | 0                  | 4                                  |
| <i>Lipid modifying agents, C10</i>                                             |                    |                                    |
| Lovastatin, C10AA02                                                            | 0                  | 0                                  |
| <i>Corticosteroids for systemic use, H02</i>                                   |                    |                                    |
| Aldosterone, H02AA01                                                           | 0                  | 0                                  |
| Betamethasone, H02AB01                                                         | 1                  | 7                                  |
| Methylprednisolone, H02AB04                                                    | 0                  | 4                                  |
| Hydrocortisone, H02AB09                                                        | 3                  | 25                                 |
| Triamcinolone, H02AB08                                                         | 7                  | 34                                 |
| <i>Antibacterials for systemic use, J01</i>                                    |                    |                                    |
| Doxycycline, J01AA02                                                           | 102                | 566                                |
| Tetracycline, J01AA07                                                          | 4                  | 27                                 |
| Sparfloxacin, J01MA09                                                          | 0                  | 0                                  |
| Levofloxacin, J01MA12                                                          | 0                  | 5                                  |
| <i>Antineoplastic agents, L01</i>                                              |                    |                                    |
| Melphalan, L01AA03                                                             | 0                  | 0                                  |
| Paclitaxel, L01CD01                                                            | 0                  | 0                                  |
| Docetaxel, L01CD02                                                             | 0                  | 0                                  |
| Epirubicin, L01DB03                                                            | 0                  | 0                                  |
| Mitomycin C, L01DC03                                                           | 0                  | 0                                  |
| Teniposide, L01CB02                                                            | 0                  | 0                                  |
| Imatinib, L01XE01                                                              | 0                  | 0                                  |
| Topotecan, L01XX17                                                             | 0                  | 0                                  |
| Irinotecan, L01XX19                                                            | 0                  | 0                                  |
| Actinomycin D, L01DA01                                                         | 0                  | 0                                  |
| <i>Muscle relaxants, M03</i>                                                   |                    |                                    |
| Vecuronium, M03AC03                                                            | 0                  | 0                                  |
| <i>Analgesics, N02</i>                                                         |                    |                                    |
| Paracetamol, N02BE01 (OTC)                                                     | 361                | 458                                |
| Sumatriptan, N02CC01                                                           | 18                 | 180                                |
| <i>Antiepileptics, N03</i>                                                     |                    |                                    |
| Phenobarbital, N03AA02                                                         | 0                  | 2                                  |
| Lamotrigine, N03AX09                                                           | 3                  | 17                                 |
| Topiramate, N03AX11                                                            | 0                  | 2                                  |

|                                                                              |    |     |
|------------------------------------------------------------------------------|----|-----|
| Gabapentin, N03AX12                                                          | 0  | 4   |
| Levetiracetam, N03AX14                                                       | 1  | 4   |
| <i>Psycholeptics, N05</i>                                                    |    |     |
| Levomepromazine, N05AA02                                                     | 0  | 1   |
| Perphenazine, N05AB03                                                        | 0  | 1   |
| Bromperidol, N05AD06                                                         | 0  | 0   |
| Clozapine, N05AH02                                                           | 0  | 1   |
| Olanzapine, N05AH03                                                          | 0  | 21  |
| Risperidone, N05AX08                                                         | 2  | 14  |
| Aripiprazole, N05AX12                                                        | 0  | 3   |
| <i>Psychoanaleptics, N06</i>                                                 |    |     |
| Imipramine, N06AA02                                                          | 0  | 4   |
| Clomipramine, N06AA04                                                        | 6  | 42  |
| Trimipramine, N06AA06                                                        | 0  | 1   |
| Nortriptyline, N06AA10                                                       | 2  | 4   |
| Citalopram, N06AB04                                                          | 17 | 101 |
| Escitalopram, N06AB10                                                        | 0  | 9   |
| Venlafaxine, N06AX16                                                         | 8  | 74  |
| Desvenlafaxine, N06AX23                                                      | 0  | 0   |
| <i>Anthelmintics, P02</i>                                                    |    |     |
| Ivermectin, P02CF01                                                          | 0  | 0   |
| <i>Antihistamines for systemic use, R06</i>                                  |    |     |
| Fexofenadine, R06AX26                                                        | 5  | 81  |
| Cetirizine, R06AE07 (OTC)                                                    | 15 | 221 |
| <b>P-gp inhibitor</b>                                                        |    |     |
| <i>Antineoplastic agents, L01</i>                                            |    |     |
| Gefitinib, L01XE02                                                           | 0  | 0   |
| Erlotinib, L01XE03                                                           | 0  | 0   |
| <i>Antithrombotic agents, B01</i>                                            |    |     |
| Dipyridamole, B01AC07                                                        | 0  | 5   |
| <i>Cardiac therapy agents, C01</i>                                           |    |     |
| Propafenone, C01BC03                                                         | 0  | 0   |
| Ranolazine, C01EB18                                                          | 0  | 0   |
| Dronedarone, C01BD07                                                         | 0  | 0   |
| <i>Beta-blocking agents, C07</i>                                             |    |     |
| Carvedilol, C07AG02                                                          | 0  | 0   |
| <i>Calcium channel blockers, C08</i>                                         |    |     |
| Gallopamil, C08DA02                                                          | 0  | 0   |
| Nicardipine, C08CA04                                                         | 0  | 0   |
| Felodipine, C08CA02                                                          | 0  | 0   |
| Nitrendipine, C08CA08                                                        | 0  | 0   |
| Bepridil, C08EA02                                                            | 0  | 0   |
| <i>Agents acting on the renin-angiotensin system, C09</i>                    |    |     |
| Captopril, C09AA01                                                           | 0  | 0   |
| <i>Sex hormones and modulators of the genital system, G03</i>                |    |     |
| Progesterone, G03DA04                                                        | 58 | 273 |
| Mifepristone, G03XB01                                                        | 0  | 0   |
| <i>Psychoanaleptics, N06</i>                                                 |    |     |
| Desipramine, N06AA01                                                         | 0  | 0   |
| Maprotiline, N06AA21                                                         | 0  | 2   |
| Duloxetine, N06AX21                                                          | 1  | 4   |
| <i>Antiprotozoals, P01</i>                                                   |    |     |
| Mepacrine/Quinacrine, P01AX05                                                | 0  | 0   |
| Quinine, P01BC01                                                             | 0  | 0   |
| Mefloquine, P01BC02                                                          | 1  | 5   |
| <i>Ectoparasitocides, incl. scabicides, insecticides and repellents, P03</i> |    |     |
| Disulfiram, P03AA04                                                          | 0  | 0   |

| <b>P-gp substrate/inhibitor</b>              |    |     |
|----------------------------------------------|----|-----|
| <i>Drugs for acid related disorders, A02</i> |    |     |
| Omeprazole, A02BC01                          | 41 | 295 |
| Pantoprazole, A02BC02                        | 12 | 36  |
| Lansoprazole, A02BC03                        | 0  | 6   |
| <i>Cardiac therapy agents, C01</i>           |    |     |
| Quinidine, C01BA01                           | 0  | 0   |
| <i>Diuretics, C03</i>                        |    |     |
| Spirolactone, C03DA01                        | 0  | 1   |
| Conivaptan, C03XA02                          | 0  | 0   |
| <i>Lipid modifying agents, C10</i>           |    |     |
| Simvastatin, C10AA01                         | 2  | 18  |
| Atorvastatin, C10AA05                        | 2  | 12  |
| <i>Antibacterials for systemic use, J01</i>  |    |     |
| Clarithromycin, J01FA09                      | 30 | 125 |
| Azithromycin, J01FA10                        | 16 | 161 |
| <i>Antimycotics for systemic use, J02</i>    |    |     |
| Ketoconazole, J02AB02                        | 1  | 5   |
| Itraconazole, J02AC02                        | 6  | 56  |
| <i>Immunosuppressants, L04</i>               |    |     |
| Sirolimus, L04AA10                           | 0  | 0   |
| Cyclosporine A, L04AD01                      | 1  | 4   |
| <i>Analgesics, N02</i>                       |    |     |
| Pentazocine, N02AD01                         | 0  | 0   |
| <i>Psycholeptics, N05</i>                    |    |     |
| Chlorpromazine, N05AA01                      | 0  | 0   |
| Fluphenazine, N05AB02                        | 0  | 1   |
| Haloperidol, N05AD01                         | 4  | 25  |
| Quetiapine, N05AH04                          | 3  | 21  |
| <i>Psychoanaleptics, N06</i>                 |    |     |
| Amitriptyline, N06AA09                       | 8  | 101 |
| Fluoxetine, N06AB03                          | 17 | 110 |
| Paroxetine, N06AB05                          | 44 | 294 |
| Sertraline, N06AB06                          | 5  | 35  |
| Fluvoxamine, N06AB08                         | 3  | 55  |
| <i>Antihistamines for systemic use, R06</i>  |    |     |
| Terfenadine, R06AX12                         | 7  | 67  |
| <b>P-gp substrate/inhibitor/inducer</b>      |    |     |
| <i>Calcium channel blockers, C08</i>         |    |     |
| Verapamil, C08DA01                           | 0  | 9   |
| Diltiazem, C08DB01                           | 1  | 2   |
| <i>Antibacterials for systemic use, J01</i>  |    |     |
| Erythromycin, J01FA01                        | 13 | 80  |
| <i>Antivirals for systemic use, J05</i>      |    |     |
| Saquinavir, J05AE01                          | 0  | 0   |
| Ritonavir, J05AE03                           | 0  | 0   |
| Nelfinavir, J05AE04                          | 0  | 1   |
| Indinavir, J05AE02                           | 0  | 0   |
| Lopinavir, J05AR10 (with ritonavir)          | 0  | 1   |
| Amprenavir, J05AE05                          | 0  | 0   |
| <i>Antineoplastic agents, L01</i>            |    |     |
| Vinblastine, L01CA01                         | 0  | 0   |
| <i>Endocrine therapy, L02</i>                |    |     |
| Tamoxifen, L02BA01                           | 0  | 0   |
| <i>Other gynecologicals, G02</i>             |    |     |
| Bromocriptine, G02CB01                       | 3  | 0   |
| <i>Immunosuppressants, L04</i>               |    |     |

|                                              |    |     |
|----------------------------------------------|----|-----|
| Tacrolimus, L04AD02                          | 0  | 3   |
| <b>P-gp inducer</b>                          |    |     |
| <i>Drugs used in diabetes, A10</i>           |    |     |
| Insulins and analogues, A10A                 | 28 | 110 |
| <i>Cardiac therapy agents, C01</i>           |    |     |
| Nicardipine, C08CA04                         | 0  | 0   |
| <i>Calcium channel blockers, C08</i>         |    |     |
| Nifedipine, C08CA05                          | 0  | 12  |
| <i>Antineoplastic agents, L01</i>            |    |     |
| Chlorambucil, L01AA02                        | 0  | 0   |
| Methotrexate, L01BA01                        | 0  | 0   |
| Fluorouracil, L01BC02                        | 0  | 3   |
| Cisplatin, L01XA01                           | 0  | 0   |
| Hydroxyurea/ hydroxycarbamide, L01XX05       | 0  | 0   |
| <i>Endocrine therapy, L02</i>                |    |     |
| Tamoxifen, L02BA01                           | 0  | 0   |
| <i>Antigout agents, M04</i>                  |    |     |
| Probenecid, M04AB01                          | 0  | 0   |
| <b>P-gp substrate/inducer</b>                |    |     |
| <i>Antimycobacterials, J04</i>               |    |     |
| Rifampicin, J04AB02                          | 0  | 2   |
| <i>Corticosteroids for systemic use, H02</i> |    |     |
| Dexamethasone, H02AB02                       | 1  | 11  |
| <i>Antineoplastic agents, L01</i>            |    |     |
| Vincristine, L01CA02                         | 0  | 0   |
| Doxorubicin, L01DB01                         | 0  | 0   |
| Daunorubicin, L01DB02                        | 0  | 0   |
| Mitoxantrone, L01DB07                        | 0  | 0   |
| Etoposide, L01CB01                           | 0  | 0   |
| <i>Antigout agents, M04</i>                  |    |     |
| Colchicine, M04AC01                          | 0  | 0   |
| <i>Analgesics, N02</i>                       |    |     |
| Morphine, N02AA01                            | 1  | 3   |
| <i>Antiepileptics, N03</i>                   |    |     |
| Phenytoin, N03AB02                           | 1  | 2   |
| Carbamazepine, N03AF01                       | 8  | 56  |
| <b>P-gp inducer/inhibitor</b>                |    |     |
| <i>Psycholeptics, N05</i>                    |    |     |
| Midazolam, N05CD08                           | 2  | 18  |
| <i>Cardiac therapy agents, C01</i>           |    |     |
| Amiodarone, C01BD01                          | 0  | 0   |
| <i>Antihypertensives, C02</i>                |    |     |
| Reserpine, C02AA02                           | 0  | 0   |

This list of P-gp substrates, inhibitors and inducers were obtained from various review articles and original articles, which reports the results from *in vitro* and *in vivo* studies. The references are as follows:

a) Review articles:

1. Unadkat JD, Dahlin A, Vijay S. Placental drug transporters. *Curr. Drug Metab.* 2004;5:125–31.
2. Schinkel AH, Jonker JW. Mammalian drug efflux transporters of the ATP binding cassette (ABC) family: an overview. *Adv. Drug Deliv. Rev.* 2003;55:3–29.
3. Endres CJ, Hsiao P, Chung FS, Unadkat JD. The role of transporters in drug interactions. *Eur. J. Pharm. Sci.* 2006;27:501–17.
4. Hutson JR, Koren G, Matthews SG. Placental P-glycoprotein and breast cancer resistance protein: influence of polymorphisms on fetal drug exposure and physiology. *Placenta.* Elsevier Ltd; 2010;31:351–7.
5. Hodges LM, Markova SM, Chinn LW, Gow JM, Kroetz DL, Klein TE, et al. Very important pharmacogene summary: ABCB1 (MDR1, P-glycoprotein). *Pharmacogenet. Genomics.* 2011;21:152–61.
6. Kim RB. Drugs as P-glycoprotein substrates, inhibitors, and inducers. *Drug Metab. Rev.* 2002;34:47–54.
7. Zhou S-FF. Structure, function and regulation of P-glycoprotein and its clinical relevance in drug disposition. *Xenobiotica.* 2008;38:802–32.

b) Original research articles:

1. Wang J-S, Zhu H-J, Gibson BB, Markowitz JS, Donovan JL, DeVane CL. Sertraline and its metabolite desmethylsertraline, but not bupropion or its three major metabolites, have high affinity for P-glycoprotein. *Biol. Pharm. Bull.* 2008;31:231–4.
2. Weiss J, Dormann SG, Martin-facklam M, Kerpen CJ. Inhibition of P-Glycoprotein by Newer Antidepressants. *J. Pharmacol. Exp. Ther.* 2003;305:197–204.
3. Akamine Y, Yasui-Furukori N, Ieiri I, Uno T. Psychotropic drug-drug interactions involving P-glycoprotein. *CNS Drugs.* 2012;26:959–73.
4. Choo EF, Leake B, Wandel C, Imamura H, Wood a J, Wilkinson GR, et al. Pharmacological inhibition of P-glycoprotein transport enhances the distribution of HIV-1 protease inhibitors into brain and testes. *Drug Metab. Dispos.* 2000;28:655–60.
5. Holtzman CW, Wiggins BS, Spinler S a. Role of P-glycoprotein in statin drug interactions. *Pharmacotherapy.* 2006;26:1601–7.
6. Harmsen S, Meijerman I, Febus CL, Maas-Bakker RF, Beijnen JH, Schellens JHM. PXR-mediated induction of P-glycoprotein by anticancer drugs in a human colon adenocarcinoma-derived cell line. *Cancer Chemother. Pharmacol.* 2010;66:765–71.
7. Shimizu M, Uno T, Sugawara K, Tateishi T. Effects of itraconazole and diltiazem on the pharmacokinetics of fexofenadine, a substrate of P-glycoprotein. *Br. J. Clin. Pharmacol.* 2006;61:538–44.

**Supplementary Table 2: The risk of specific anomalies among cases of individual drug with association and the risk determination from the comparison with the reference population**

| Types of specific anomalies                | Drugs with associations | Number of users, n (%)                       |                                 | OR (95% CI)                 | p value†     |
|--------------------------------------------|-------------------------|----------------------------------------------|---------------------------------|-----------------------------|--------------|
|                                            |                         | Case of specific anomalies (N <sub>s</sub> ) | Reference population (N=25,126) |                             |              |
| Heart anomalies<br>(N <sub>s</sub> =1244)  | Cimetidine              | 2 (0.2)                                      | 20 (0.08)                       | 2.02 (0.47-8.66)            | 0.28         |
|                                            | Ranitidine              | 3 (0.2)                                      | 142 (0.6)                       | 0.43 (0.14-1.34)            | 0.17         |
| Genital (N <sub>s</sub> =406)              | Omeprazole              | 8 (2)                                        | 295 (1.2)                       | 1.69 (0.83-3.44)            | 0.16         |
|                                            | Pantoprazole            | 1 (0.2)                                      | 36 (0.1)                        | 1.72 (0.24-12.58)           | 0.45         |
| Respiratory (N <sub>s</sub> =84)           | Morphine                | 1 (1.2)                                      | 3 (0.01)                        | <b>100.9 (10.39-979.94)</b> | <b>0.013</b> |
| Musculoskeletal<br>(N <sub>s</sub> =1,054) | Haloperidol             | 3 (0.3)                                      | 25 (0.1)                        | 2.87 (0.86-9.51)            | 0.1          |
|                                            | Quetiapine              | 1 (0.1)                                      | 21 (0.1)                        | 1.14 (0.15-8.45)            | 0.6          |
|                                            | Risperidone             | 1 (0.1)                                      | 14 (0.1)                        | 1.70 (0.22-12.97)           | 0.46         |
| Nervous system<br>(N <sub>s</sub> =347)    | Fluoxetine              | 1 (0.3)                                      | 110 (0.4)                       | 0.66 (0.092-4.72)           | 1.0          |
|                                            | Citalopram              | 4 (1.2)                                      | 101 (0.4)                       | 2.89 (1.06-7.9)             | 0.056        |
|                                            | Paroxetine              | 4 (1.2)                                      | 294 (1.2)                       | 0.99 (0.37-2.66)            | 1.0          |
|                                            | Sertraline              | 1 (0.3)                                      | 35 (0.1)                        | 2.07 (0.28-15.17)           | 0.39         |
|                                            | Fluvoxamine             | 1 (0.3)                                      | 55 (0.2)                        | 1.32 (0.18-9.55)            | 0.54         |

†Fisher's exact test

**Supplementary Table 3: The risk estimation of overall and specific congenital anomalies with P-gp-mediated drug interaction patterns, excluding SSRIs as drugs with associations**

| Drug interaction patterns |                                                   | Users, n (%)   |                                 | Odds ratios (95% CI)       | p value†     |
|---------------------------|---------------------------------------------------|----------------|---------------------------------|----------------------------|--------------|
|                           |                                                   | Case (N=4,634) | Reference population (N=25,126) |                            |              |
| A                         | Use of P-gp substrates alone                      | 174 (3.8)      | 1292 (5.1)                      | 1.0                        | -            |
|                           | Use of P-gp substrates + any inhibitor/inducer*   | 25 (0.5)       | 228 (0.9)                       | 0.81 (0.52-1.27)           | 0.4          |
| B                         | Drugs with assoc. alone                           | 9 (0.2)        | 384 (1.5)                       | 1.0                        | -            |
|                           | Drugs with assoc. + substrate                     | 5 (0.06)       | 69 (0.3)                        | 3.09 (1.0-9.5)             | 0.055        |
|                           | Drugs with assoc. + substrate + inhibitor**       | 3 (0.06)       | 14 (0.06)                       | <b>9.14 (2.22-37.5)</b>    | <b>0.01</b>  |
| C                         | Drugs (S) with assoc. alone                       | 1 (0.02)       | 129 (0.5)                       | 1.0                        | -            |
|                           | Drugs (S) with assoc. + substrate                 | 2 (0.04)       | 16 (0.06)                       | <b>16.13 (1.38-187.99)</b> | <b>0.039</b> |
|                           | Drugs (S) with assoc. + substrate + inhibitor**   | 1 (0.02)       | 7 (0.03)                        | 18.43 (1.04-326.42)        | 0.11         |
| D                         | Drugs (S/I) with assoc. alone                     | 8 (0.2)        | 259 (1.0)                       | 1.0                        | -            |
|                           | Drugs (S/I) with assoc. + substrate               | 3 (0.06)       | 56 (0.2)                        | 1.73 (0.45-6.7)            | 0.43         |
|                           | Drugs (S/I) with assoc. + substrate + inhibitor** | 2 (0.04)       | 11 (0.04)                       | 5.89 (1.12-31.05)          | 0.073        |

The reference for the odds ratio calculation is the use of drug substrates alone for each subgroup.

A) showed the risk of overall anomalies associated with drug interactions in all P-gp substrates;

B) showed the risk for specific anomalies (heart, genital, respiratory, musculoskeletal) in drugs previously associated with these anomalies (cimetidine, ranitidine, omeprazole, pantoprazole, morphine, haloperidol, risperidone, quetiapine);

C) showed the risk for specific anomalies (heart, musculoskeletal) in P-gp substrates (S) previously associated with these anomalies (cimetidine, ranitidine, risperidone);

D) showed the risk for specific anomalies (genital, musculoskeletal) in P-gp substrates/inhibitors (S/I) previously associated with these anomalies (omeprazole, pantoprazole, haloperidol, quetiapine);

\* substrate/inhibitor, inhibitor, inducer, substrate/inducer, and substrate/inducer/inhibitor;

\*\* substrate/inhibitor, inhibitor, inhibitor/inducer, substrate/ inhibitor/inducer;

†Fisher's exact test
